# Supplementary material for: Facile and rapid synthesis of emission color-tunable molybdenum oxide quantum dots as a versatile probe for fluorescence imaging and environmental monitoring
Source: Royal Society of Chemistry journal article supplement (doi:10.1039/d0an01510e), 2020-01-01
Supplement: d0an01510e1.pdf [file d0an01510e1.pdf]

16 **Table S1.** Photoelectron binding energies of Mo 3d level XPS spectra in different pH.

| Sample                    | Ration of Mo <sup>6+</sup> to Mo <sup>5+</sup> | Mo 3d <sub>5/2</sub> |         | Mo 3d <sub>3/2</sub> |        |
|---------------------------|------------------------------------------------|----------------------|---------|----------------------|--------|
|                           |                                                | Centre (eV)          | Area    | Centre (eV)          | Area   |
| MoO <sub>x</sub> (pH 9.0) | 1.6588                                         | 232.6 (+6)           | 8923.8  | 235.7 (+6)           | 4923.8 |
|                           |                                                | 231.4 (+5)           | 4723.8  | 234.5 (+5)           | 3623.8 |
| MoO <sub>x</sub> (pH 5.0) | 1.5134                                         | 232.6 (+6)           | 10814.3 | 235.7 (+6)           | 7087.2 |
|                           |                                                | 231.4 (+5)           | 7814.3  | 234.5 (+5)           | 4014.3 |
| MoO <sub>x</sub> (pH 2.0) | 0.9149                                         | 232.6 (+6)           | 4965.1  | 235.7 (+6)           | 3204.8 |
|                           |                                                | 231.4 (+5)           | 5165.1  | 234.5 (+5)           | 3765.1 |

17 **Table S2.** Photoelectron binding energies of P 2p level XPS spectra in different pH.

| Sample                    | P 2p <sub>3/2</sub>  |       | P 2p <sub>1/2</sub>  |       |
|---------------------------|----------------------|-------|----------------------|-------|
|                           | Centre (eV)          | Area  | Centre (eV)          | Area  |
| MoO <sub>x</sub> (pH 9.0) | 129.3 (Mo-P)         | 108.8 | 131.5 (Mo-P)         | 67.8  |
|                           | 132.6 (oxygenated P) | 73.8  | 133.7 (oxygenated P) | 194.0 |
| MoO <sub>x</sub> (pH 5.0) | 129.3 (Mo-P)         | 14.1  | 131.5 (Mo-P)         | 32.3  |
|                           | 132.6 (oxygenated P) | 199.3 | 133.7 (oxygenated P) | 418.3 |

18 **Table S3.** Fluorescence lifetimes obtained with two-exponential fit of the

19 fluorescence decay curves of the N,P-MoO<sub>x</sub> QDs in pH 9.0, 2.0, respectively.

| Samples                       | $\tau_1$ /ns | A <sub>1</sub> | $\tau_2$ /ns | A <sub>2</sub> | $\tau_3$ /ns | A <sub>3</sub> | $\tau$ /ns |
|-------------------------------|--------------|----------------|--------------|----------------|--------------|----------------|------------|
| N,P-MoO <sub>x</sub> (pH 9.0) | 0.1642       | -166.0675      | 0.5092       | 386.7519       | 3.4454       | 91.5874        | 2.4382     |
| N,P-MoO <sub>x</sub> (pH 2.0) | 0.7175       | 264.4625       | 4.2277       | 45.0684        | /            | /              | 2.4762     |

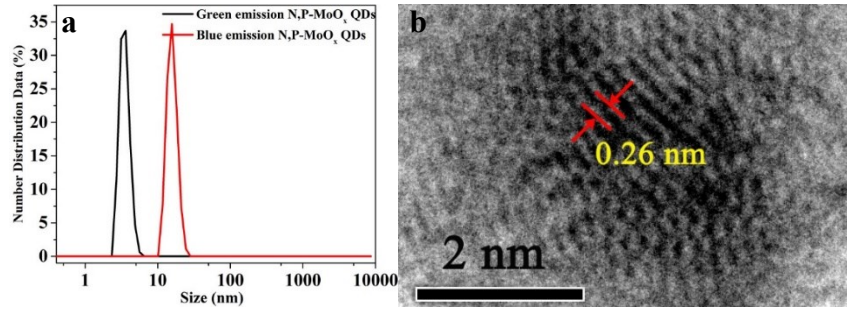

20

21 Fig. S1 (a) DLS spectra of green emission N,P-MoO<sub>x</sub> QDs solution (black line) and

22 blue emission N,P-MoO<sub>x</sub> QDs; (b) HRTEM image of green emission N,P-MoO<sub>x</sub> QDs.

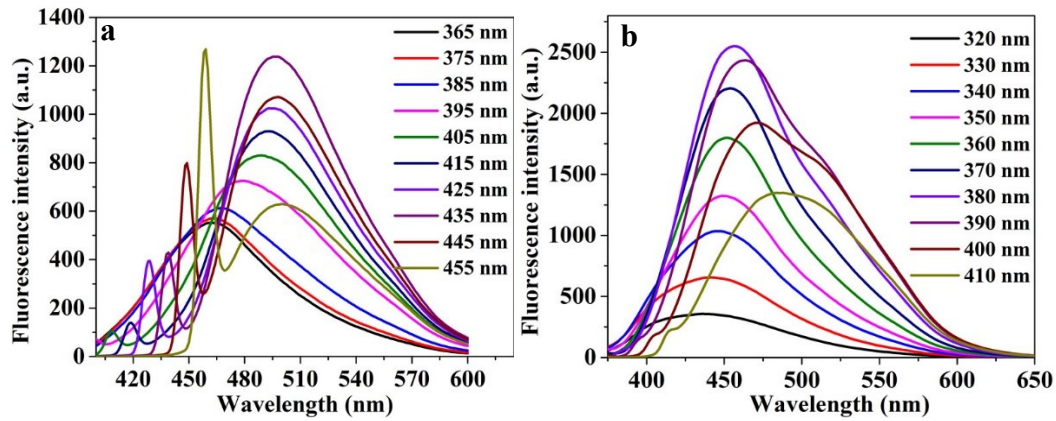

23

24 Fig. S2 (a) Emission spectra of green emission N,P-MoO<sub>x</sub> QDs at excitation

25 wavelengths from 365 to 455 nm; (b) Emission spectra of blue emission N,P-MoO<sub>x</sub>

26 QDs at excitation wavelengths from 320 to 410 nm.

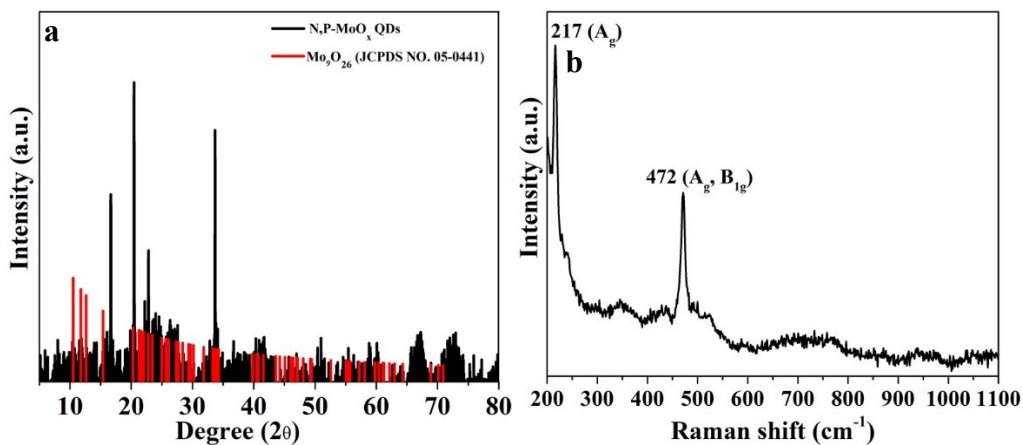

27

28 Fig. S3 (a) XRD patterns of N,P-MoO<sub>x</sub> QDs. XRD patterns at the bottom show

29 Mo<sub>9</sub>O<sub>26</sub> (JCPDS NO. 05-0441). (b) Raman spectrum of N,P-MoO<sub>x</sub> QDs.

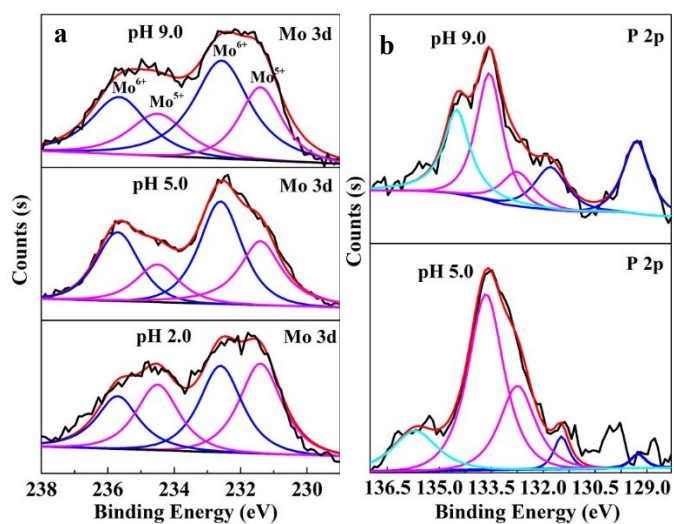

30

31 Fig. S4 XPS spectra in the Mo 3d (a) and P 2p (b) regions under different pH

32 conditions.

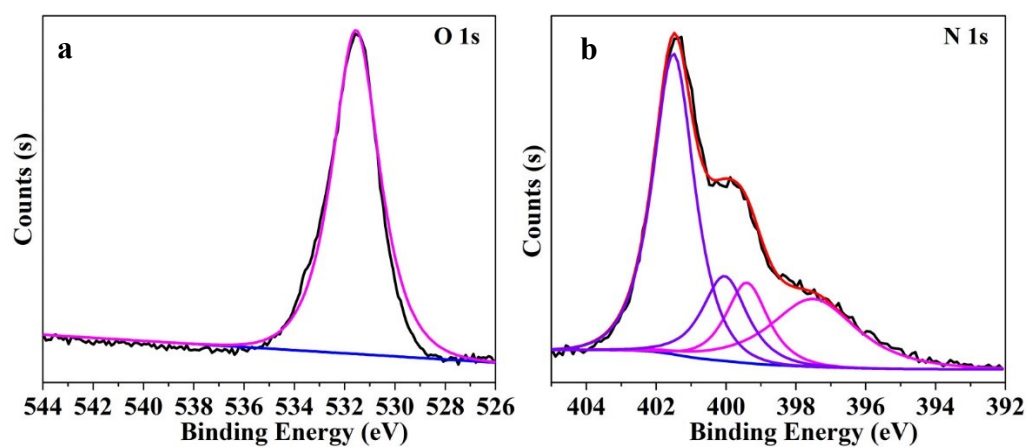

33

34 Fig. S5 XPS spectrum in the O 1s (a) and N 1s (b) region of N,P-MoO<sub>x</sub> QDs.

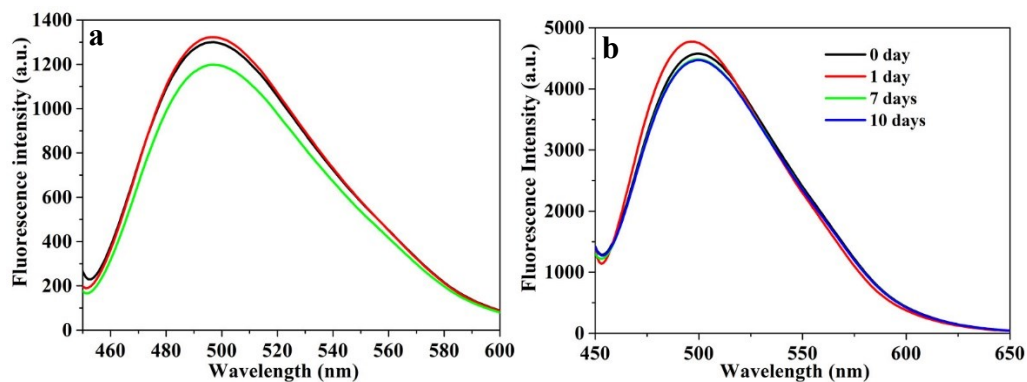

35

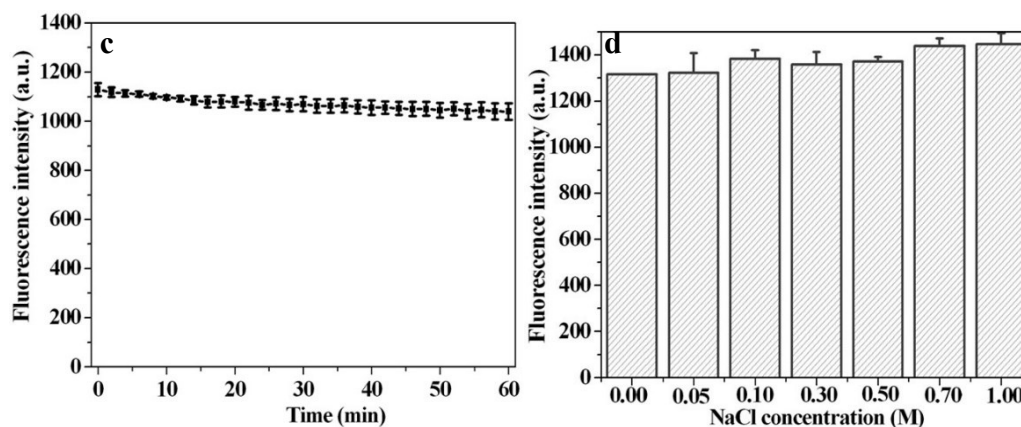

36

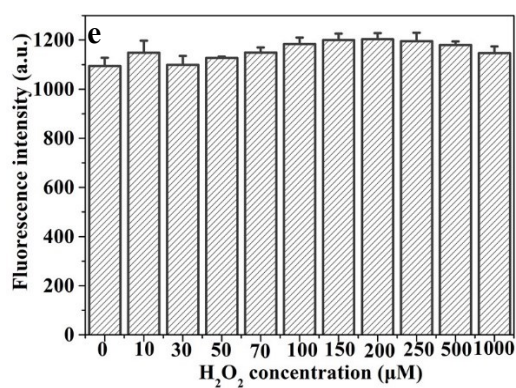

37

38 Fig. S6 The fluorescence spectra of N,P-MoO<sub>x</sub> QDs (a) from different batches  
 39 prepared in the same condition, (b) with different storage time (0-10 day), (c) with  
 40 different illumination time (0-60 min), (d) with different concentrations of NaCl (0-1  
 41 M), (e) with different concentrations of H<sub>2</sub>O<sub>2</sub> (0-1000 μM).

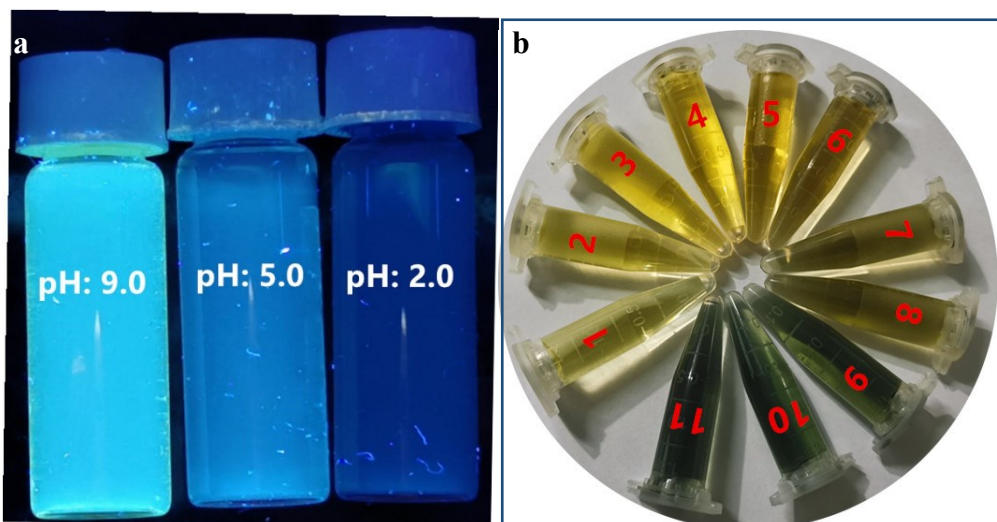

42

43 Fig. S7 (a) The color of N,P-MoO<sub>x</sub> QDs solutions in different pH condition under the  
 44 irradiation of 365 nm UV lamp; (b)The color of N,P-MoO<sub>x</sub> QDs solutions in different  
 45 pH condition: 1-pH 9.0; 2-pH 8.0; 3-pH 7.0; 4-pH 6.0; 5-pH 5.0; 6-pH 4.5; 7-pH 4.0;  
 46 8-pH 3.5; 9-pH 3.0; 10-pH 2.5; 11-pH 2.0.

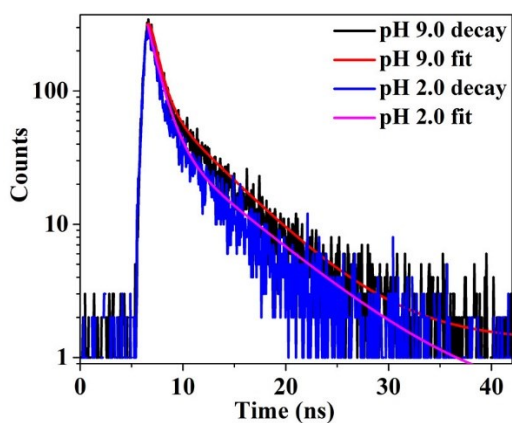

47

48 Fig. S8 Fluorescence lifetimes of N,P-MoO<sub>x</sub> QDs in different pH condition.

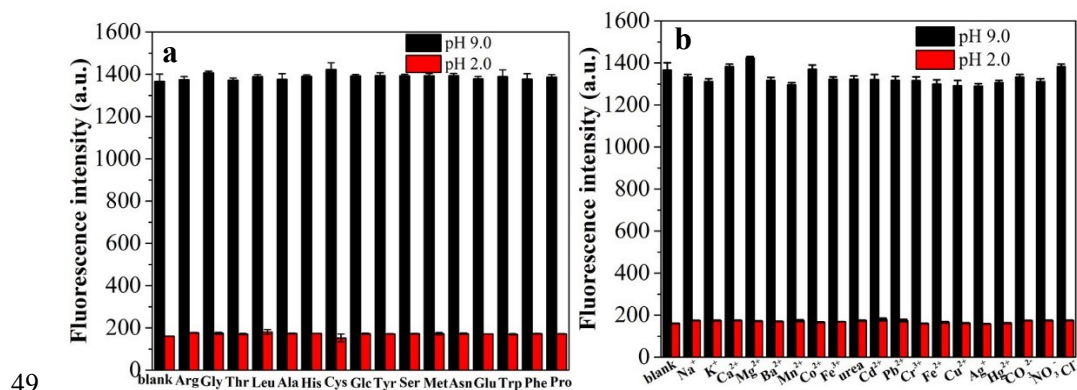

49  
 50 Fig. S9 Fluorescence intensity at 500 nm of the probe at pH 2.0 and 9.0 in the  
 51 presence of (a) metal ions: 100 mM Na<sup>+</sup> and K<sup>+</sup>, 1 mM Ca<sup>2+</sup> and Mn<sup>2+</sup>, 0.5 mM Mg<sup>2+</sup>,  
 52 urea and Ba<sup>2+</sup>, 0.25 mM Cr<sup>3+</sup>, 0.1 mM Co<sup>2+</sup> and Fe<sup>3+</sup>, 0.05 mM Cd<sup>2+</sup> and Fe<sup>2+</sup>, 0.01  
 53 mM Cu<sup>2+</sup>, 0.005 mM Pb<sup>2+</sup>, Ag<sup>+</sup> and Hg<sup>2+</sup>, 100 mM NO<sub>3</sub><sup>-</sup>, 50 mM CO<sub>3</sub><sup>2-</sup>, 2 mM Cl<sup>-</sup> ;  
 54 (b) biomolecules: 1 mM Arg, Gly, Thr, Leu, Ala, His, Cys, Glc, Tyr, Ser, Met, Asn,  
 55 Glu, Trp, Phe and Pro.

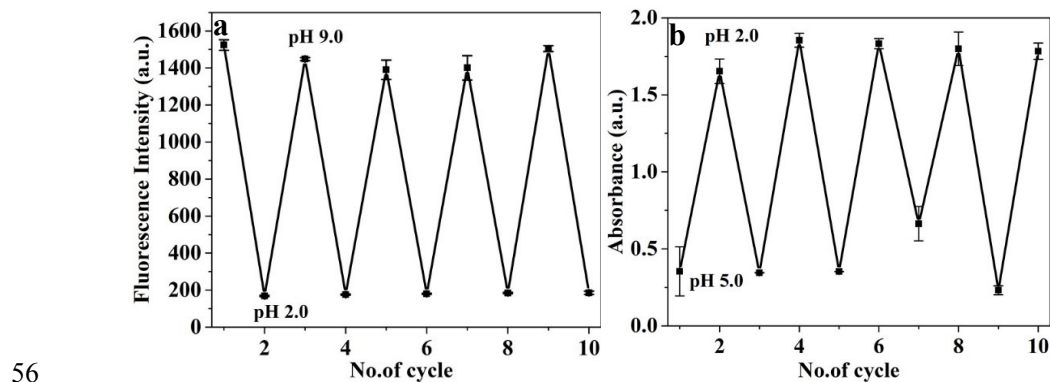

56  
 57 Fig.S10 Reversibility of N,P-MoO<sub>x</sub> QDs in different pH values. (A) the fluorescence  
 58 intensity of N,P-MoO<sub>x</sub> QDs reversibly decreased and then increased by alternating the  
 59 pH value of the system from pH 9.0 to 2.0 and then from 2.0 to 9.0. (B) the  
 60 absorbance intensity of N,P-MoO<sub>x</sub> QDs reversibly increased and then decreased by  
 61 alternating the pH value of the system from pH 5.0 to 2.0 and then from 2.0 to 5.0.

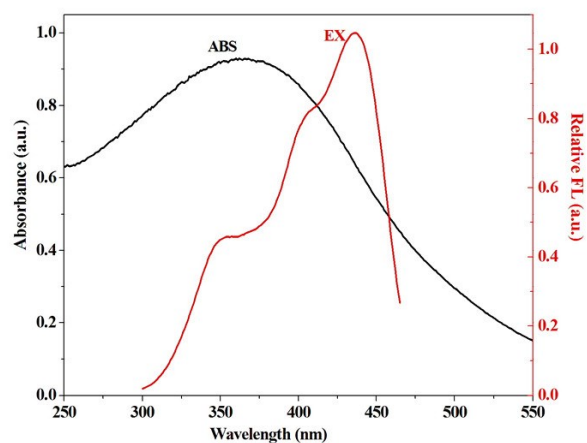

62

63 Fig. S11 The UV absorption spectrum of  $\text{MnO}_4^-$  and excitation spectrum of N,P-MoO<sub>x</sub>

64 QDs.

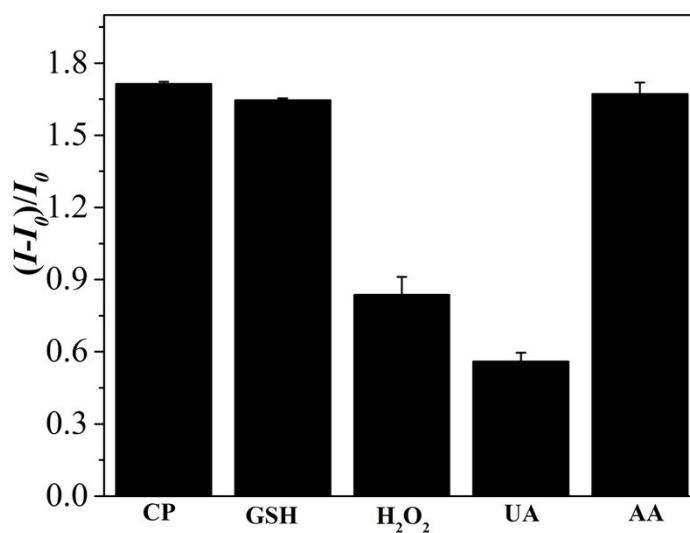

65

66 Fig. S12 The relative fluorescence intensities  $([(I-I_0)/I_0])$  at 510 nm of N,P-MoO<sub>x</sub>

67 QDs-MnO<sub>4</sub><sup>-</sup> after the addition of 31 μM CP or 31 μM other reducing substances,

68 including GSH, H<sub>2</sub>O<sub>2</sub>, UA and AA, respectively.



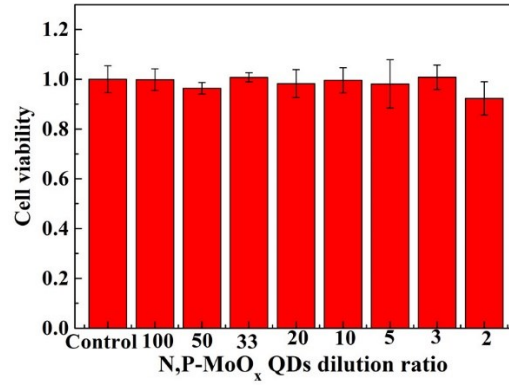

69

70 Fig. S13 The viability of HEB cell after being incubated with N,P-MoO<sub>x</sub> QDs in the  
71 dilution ratio range from 2 to 100. The error bars represent standard deviations based  
72 on three independent measurements.
